# Supplementary material
Source: publisher site journal article supplement (https://www.dovepress.com/article/129720)
Supplement: Supplementary file 1 [file get_supplementary_file.php]

# Supporting Information

## Development of $^{99m}\text{Tc}$ -Radiolabeled Nanosilica for Targeted Detection of HER2-Positive Breast Cancer

*Paolo Rainone,<sup>1,2,‡</sup> Benedetta Riva,<sup>3,‡</sup> Sara Belloli,<sup>1,\*</sup> Francesco Sudati,<sup>4</sup> Marilena Ripamonti,<sup>1</sup> Paolo Verderio,<sup>3</sup> Miriam Colombo,<sup>3</sup> Barbara Colzani,<sup>3</sup> Maria Carla Gilardi,<sup>1</sup> Rosa Maria Moresco,<sup>5</sup> Davide Prospero<sup>3,\*</sup>*

<sup>1</sup> Institute of Molecular Bioimaging and Physiology of CNR, Via Fratelli Cervi 93, 20090 Segrate, Italy.

<sup>2</sup> Doctorate School of Molecular and Translational Medicine, University of Milan, Milan, Italy.

<sup>3</sup> NanoBioLab, Dipartimento di Biotecnologie e Bioscienze, Università di Milano-Bicocca, Piazza della Scienza 2, 20126 Milano, Italy.

<sup>4</sup> PET and Nuclear Medicine Unit, San Raffaele Scientific Institute, Via Olgettina 60, 20132 Milan, Italy.

<sup>5</sup> Department of Medicine and Surgery, University of Milano-Bicocca, Via Cadore 48, 20900 Monza, Italy.

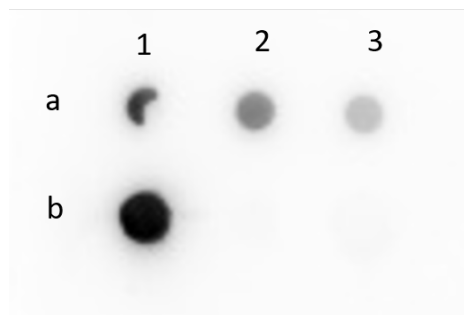

**Figure S1.** The digitized image of the Dot Blot analysis performed on SiNP-TZ (b1) compared to SiNP (b2) and core-shell NPs (b3). Dots from (a1) to (a3) represent standard amount of TZ (150, 75, 37 ng, respectively).

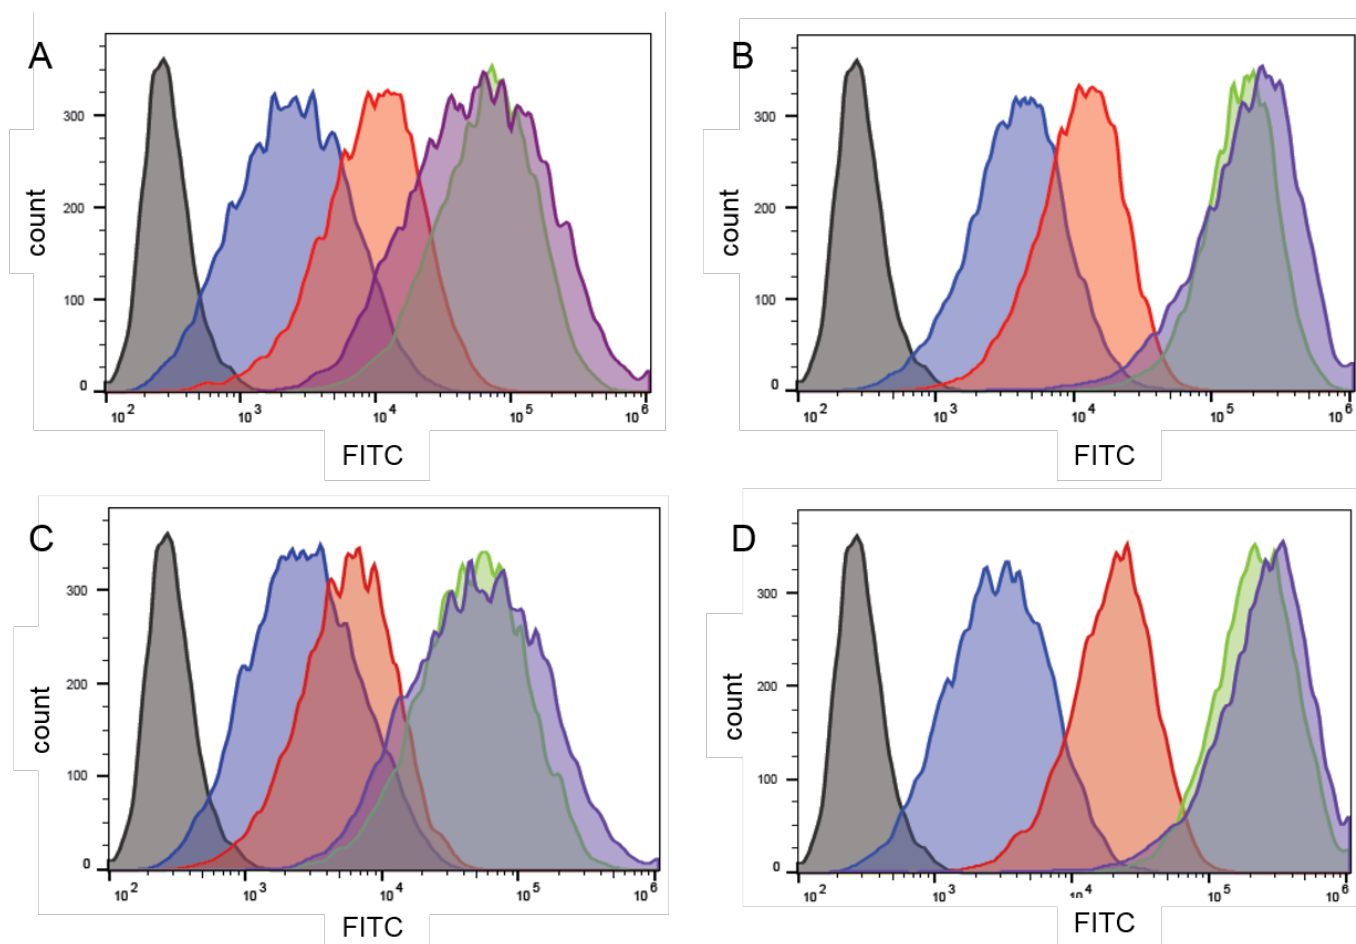

**Figure S2.** Assessment of binding specificity by flow cytometry. HER2<sup>+</sup> SK-BR-3 cells were incubated with 50 mg/mL of A) SiNP, B) SiNP-TZ, C) SiNP-NTA and D) SiNP-NTA-TZ for 20 min (blue), 1 h (red), 4 h (green) and 24 h (violet). Untreated cells were used as negative control (grey) to set the autofluorescence of the cells.

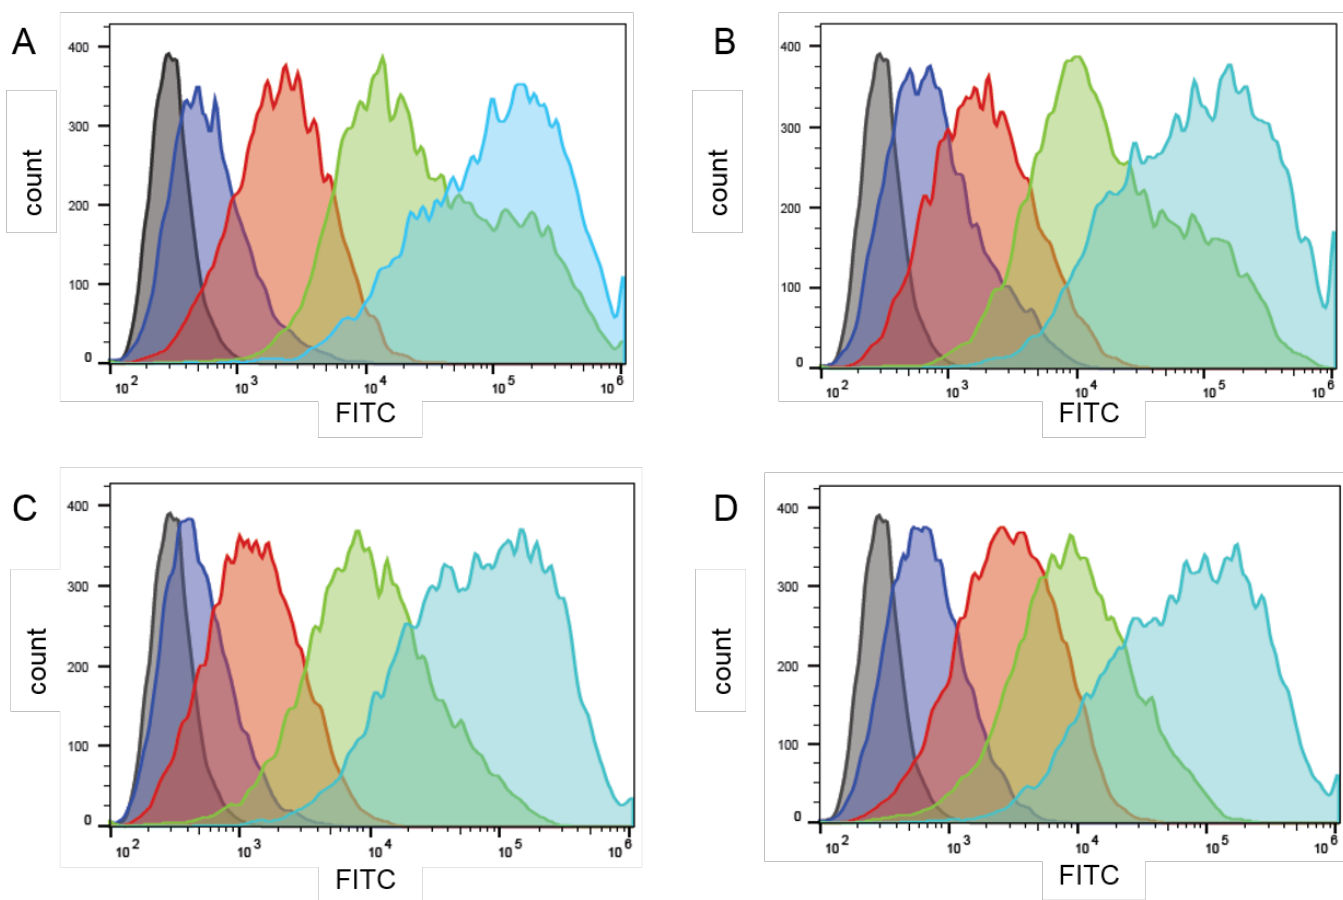

**Figure S3.** Assessment of binding specificity by flow cytometry. HER2<sup>+</sup> MDA-MB-468 cells were incubated with 50 mg/mL of A) SiNP, B) SiNP-TZ, C) SiNP-NTA and D) SiNP-NTA-TZ for 20 min (dark blue), 1 h (red), 4 h (green) and 24 h (light blue). Untreated cells were used as negative control (grey) to set the autofluorescence of cells.

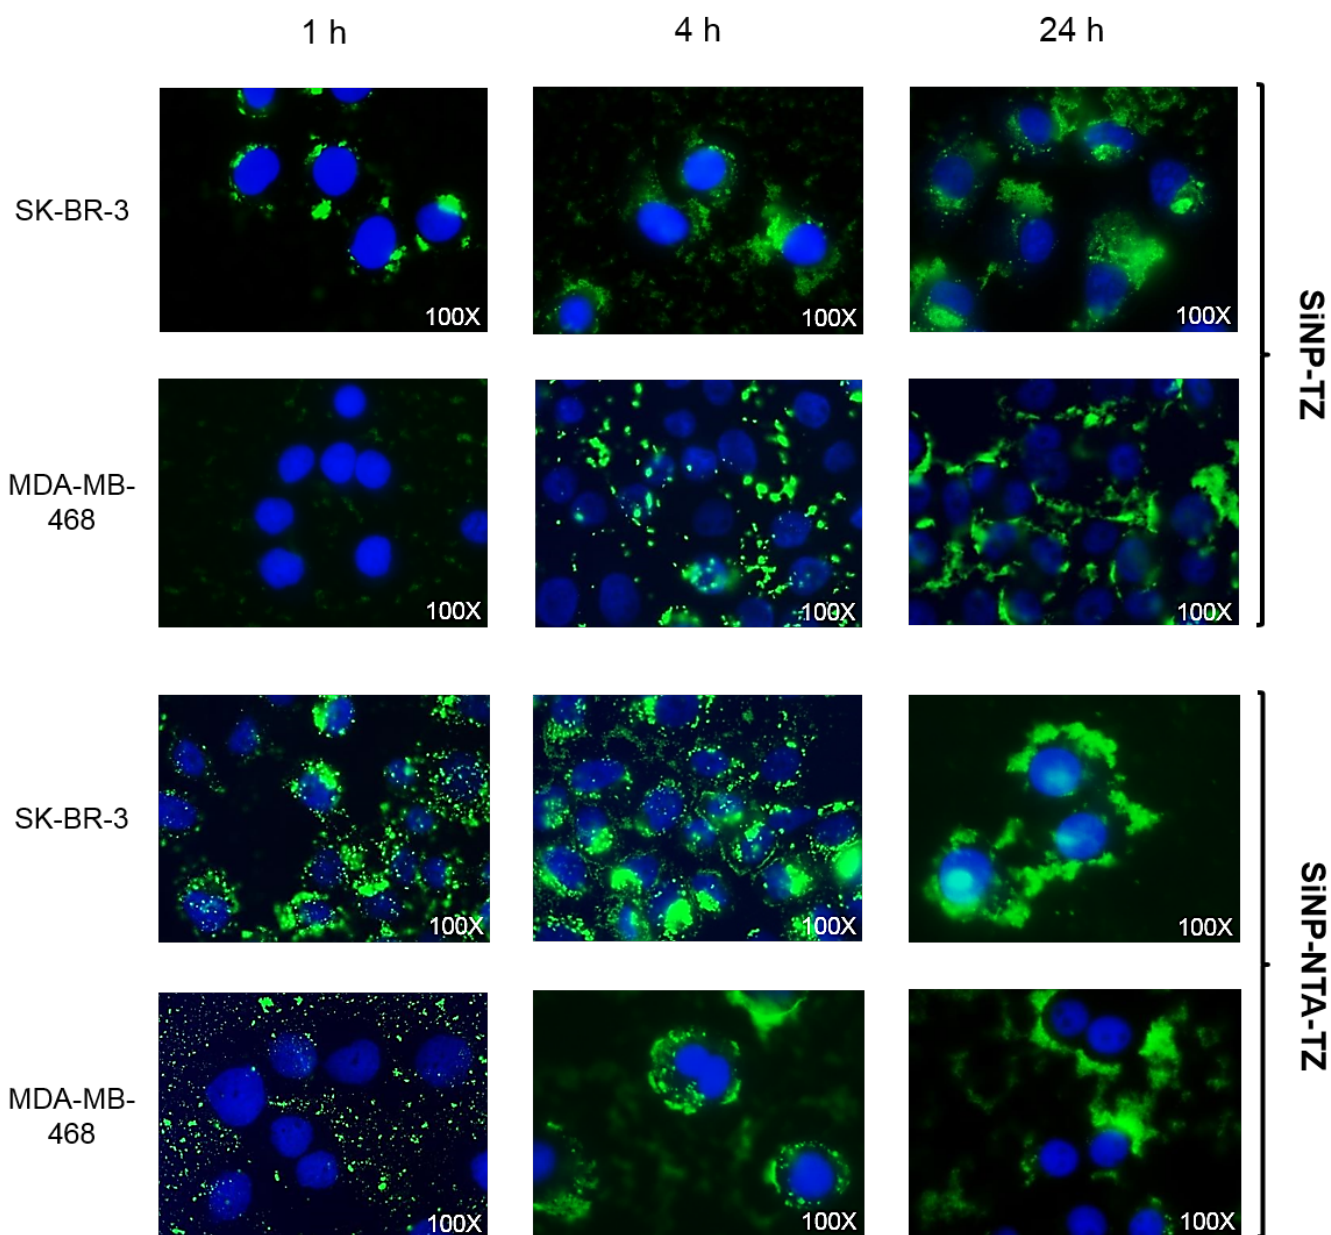

**Figure S4.** Specificity binding evaluation by fluorescence microscopy. SK-BR-3 and MDA-MB-468 cells were grown on coverslips for 24 h and then exposed for 1, 4 and 24 h to 50  $\mu\text{g/ml}$  of FITC-labeled (green) SiNPs, functionalized with Hc-TZ. Nanoparticles were engineered with or without nitrilotriacetic acid chelating linker (NTA), for evaluate its contribution on targeting capability. Nuclei were stained with Hoechst (blue).

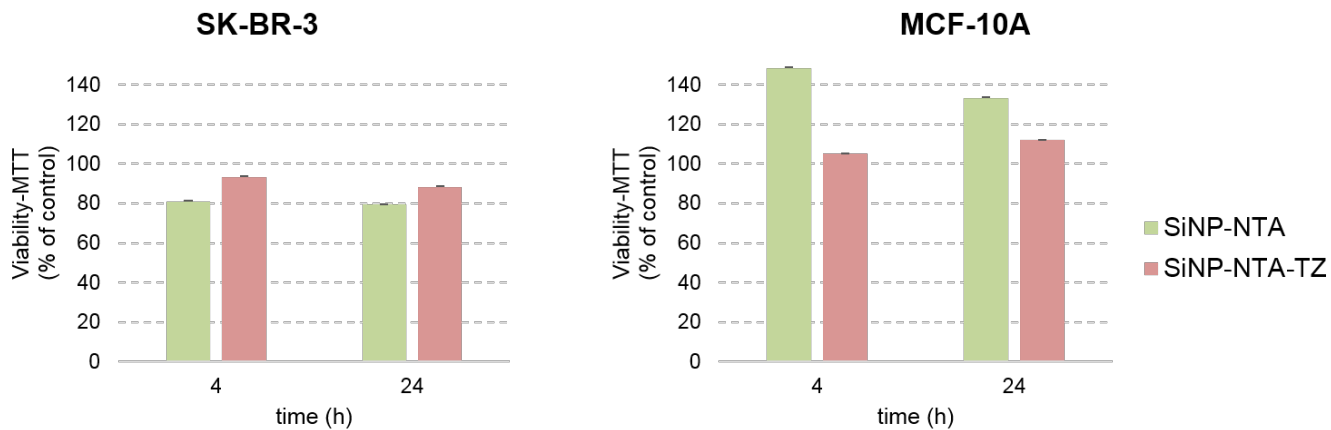

**Figure S5.** MTT test was replicated at 4 and 24 h in non-transformed mammary epithelial MCF-10A cell line, (HER2<sup>-</sup>) in comparison to SK-BR-3 breast cancer cell line (HER2<sup>+</sup>), incubated with SiNP-NTA and/or SiNP-NTA-TZ.

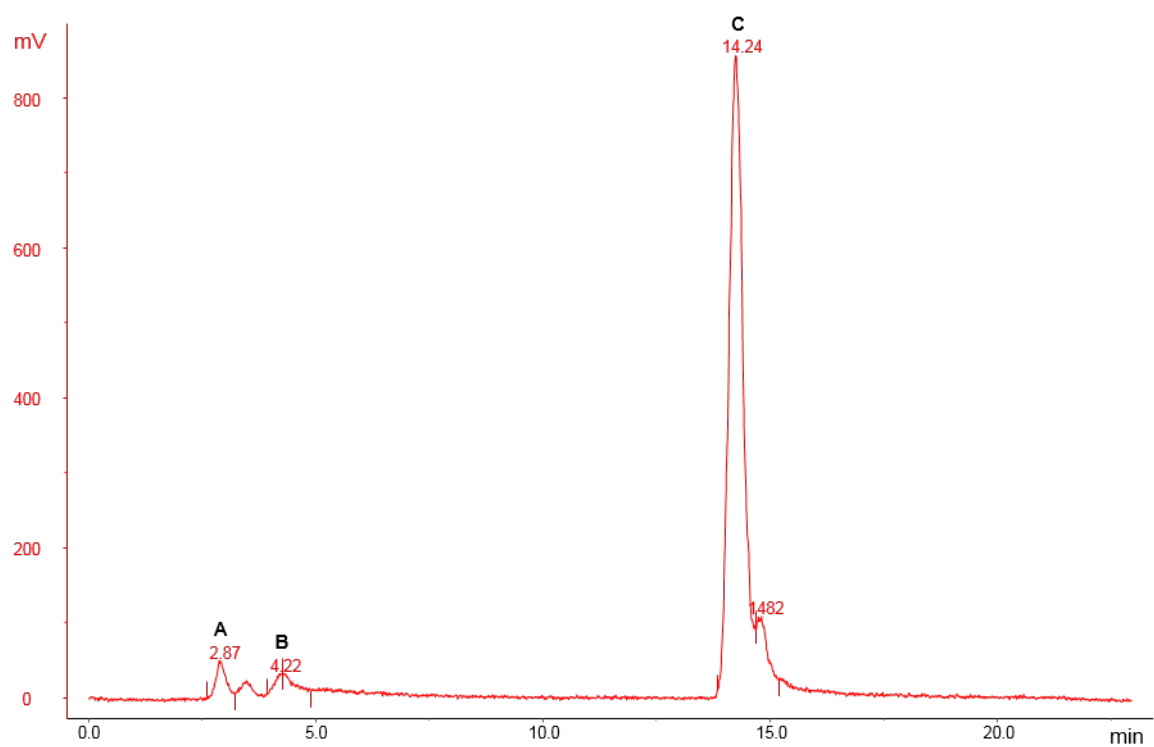

**Figure S6.** Radiochemical yield of  $^{99m}\text{Tc}$ -Tricarbonyl core labeling HisTag, after 50 min incubation: Pertechnetate [ $^{99m}\text{TcO}_4$ ] $^-$  (A);  $^{99m}\text{Tc}$ -Tricarbonyl core [ $^{99m}\text{Tc}(\text{CO})_3$ ] $^+$  (B);  $^{99m}\text{Tc}$ -Tricarbonyl-HisTag complex (C).

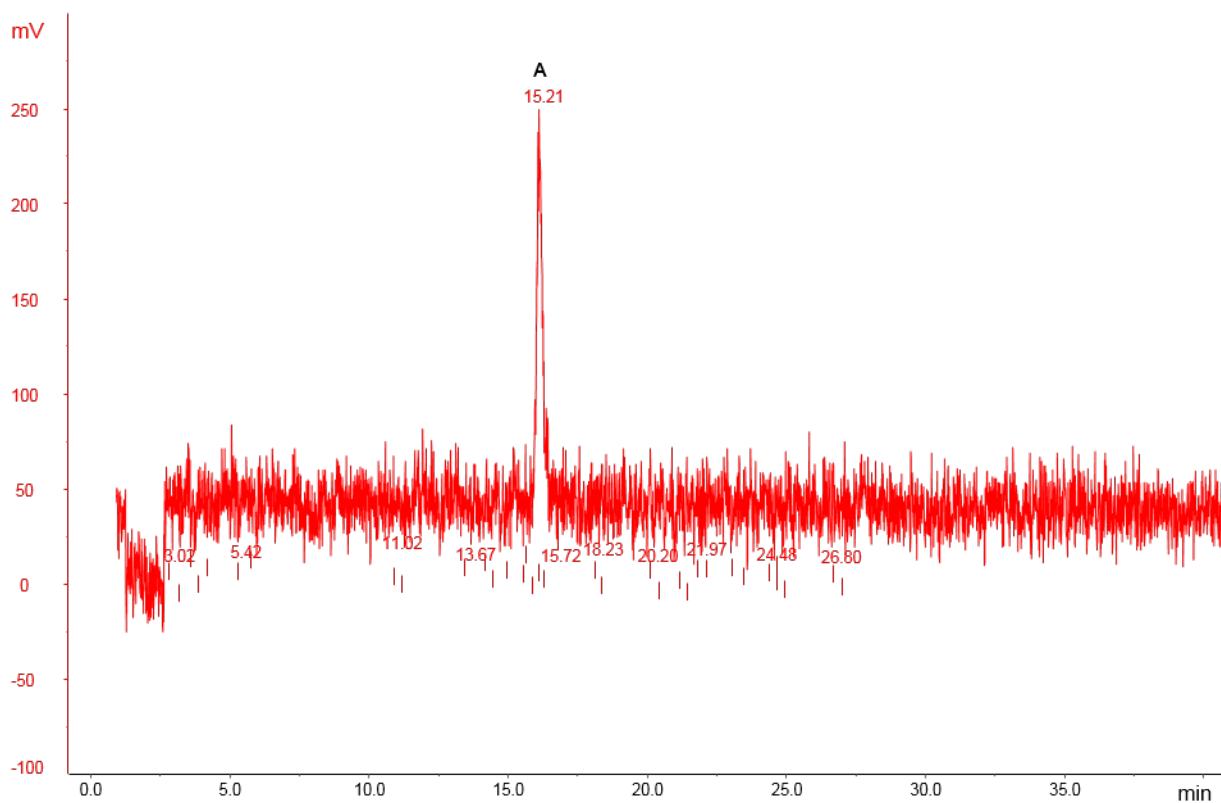

**Figure S7.** Stability of  $^{99m}\text{Tc}$ -Tricarbonyl-HIS-TAG complex after 24 hr EOS, in aqueous solutions over a broad pH range (pH 2-12):  $^{99m}\text{Tc}$ -Tricarbonyl-HisTag complex (A).

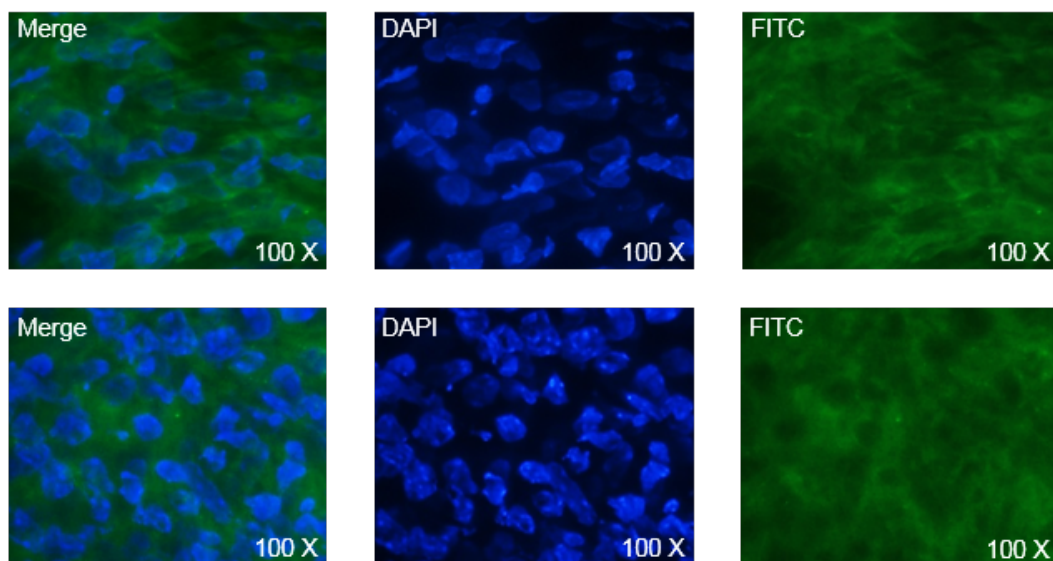

**Figure S8.** *Ex vivo* fluorescence microscopy acquisition on SK-BR-3 tumor cryosections collected at 24 h post-injection of SiNP-NTA (top) and SiNP-NTA-TZ (bottom). Merge images represent the colocalization of SiNPs (green) and reporting nuclei (blue).



| Tissue<br>(%ID/g) | At 4 h<br>(n=3) |              | At 6 h<br>(n=3) |             | At 24 h<br>(n=4) |              |
|-------------------|-----------------|--------------|-----------------|-------------|------------------|--------------|
|                   | SiNP-NTA        | SiNP-NTA-TZ  | SiNP-NTA        | SiNP-NTA-TZ | SiNP-NTA         | SiNP-NTA-TZ  |
| Blood             | 0.84 ± 0.14     | 1.27 ± 0.24  | 0.88 ± 0.21     | 1.05 ± 0.15 | 0.43 ± 0.06      | 0.52 ± 0.11  |
| Heart             | 0.32 ± 0.07     | 0.44 ± 0.01  | 0.46 ± 0.13     | 0.33 ± 0.13 | 0.22 ± 0.02      | 0.99 ± 1.53  |
| Lung              | 0.89 ± 0.13     | 2.31 ± 0.79  | 1.09 ± 0.12     | 1.38 ± 0.64 | 0.47 ± 0.07      | 0.35 ± 1.28  |
| Liver             | 58.6 ± 10.9     | 36.3 ± 7.13* | 44.6 ± 34.9     | 13.2 ± 11.7 | 7.83 ± 2.08      | 9.14 ± 5.34  |
| Spleen            | 6.48 ± 0.49     | 6.96 ± 1.00  | 4.98 ± 4.68     | 2.62 ± 3.68 | 0.82 ± 0.20      | 2.42 ± 1.89  |
| Stomach           | 0.44 ± 0.17     | 0.46 ± 0.28  | 0.52 ± 0.21     | 0.42 ± 0.16 | 0.33 ± 0.05      | 0.25 ± 0.12  |
| Kidney            | 13.3 ± 1.55     | 5.52 ± 0.04* | 51.6 ± 59.8     | 6.83 ± 1.36 | 14.3 ± 2.02      | 5.19 ± 1.57* |
| Intestine         | 0.72 ± 0.18     | 1.44 ± 0.88  | 1.99 ± 1.22     | 0.43 ± 0.17 | 0.35 ± 0.07      | 0.26 ± 0.06  |
| Tumor             | 0.52 ± 0.08     | 0.67 ± 0.30  | 1.06 ± 0.43     | 0.35 ± 0.07 | 0.77 ± 0.28      | 0.32 ± 0.07  |
| Tiroyd            | 0.53 ± 0.11     | 0.67 ± 0.19  | 0.54 ± 0.12     | 0.44 ± 0.08 | 0.40 ± 0.09      | 0.35 ± 0.11  |
| Muscle            | 0.31 ± 0.02     | 0.19 ± 0.03* | 0.38 ± 0.29     | 0.18 ± 0.05 | 0.26 ± 0.08      | 0.13 ± 0.03  |

**Table S1.** Radioactivity distribution after <sup>99m</sup>Tc-labeled SiNP-NTA or SiNP-NTA-TZ injection. Radioactivity concentration is expressed as percentage of injected dose per gram of tissue (%ID/g). Values are expressed as mean ±S.D. of three rats for each time point. (\*p<0.05 vs. SiNP-NTA)
